# Supplementary material for: Focal laser stimulation of fly nociceptors activates distinct axonal and dendritic Ca2+ signals
Source: PubMed Central journal article supplement (PMC8390926; doi:10.1016/j.bpj.2021.06.001), 2021-06-25
Supplement: mmc1.pdf [file mmc1.pdf]

**Biophysical Journal, Volume 120**

**Supplemental information**

**Focal laser stimulation of fly nociceptors activates distinct axonal and dendritic Ca<sup>2+</sup> signals**

**Rajshekhar Basak, Sabyasachi Sutradhar, and Jonathon Howard**

# Focal Laser Stimulation of Fly Nociceptors Activates Distinct Axonal and Dendritic Ca<sup>2+</sup> Signals

## Supplementary Materials

Rajshekhar Basak<sup>1</sup>, Sabyasachi Sutradhar<sup>1</sup> and Jonathon Howard<sup>1</sup>

<sup>1</sup>Department of Molecular Biophysics & Biochemistry,  
Yale University, New Haven, CT 06511

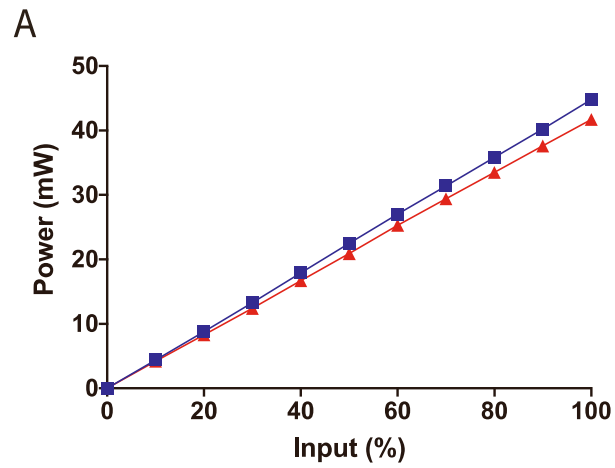

**Supplementary Figure 1:** Measured power output (mW) across various input values (%) from 405-nm stimulus used to pulse Class IV neurons. Blue corresponds to stimulus with FWHM = 0.5  $\mu\text{m}$ , red corresponds to stimulus with FWHM = 1  $\mu\text{m}$ . Measurements were made using a microscope slide power sensor (S170C, Thor Labs) and a Touchscreen Optical Power and Energy Meter Console (PM400, Thor Labs) at the sample plane.

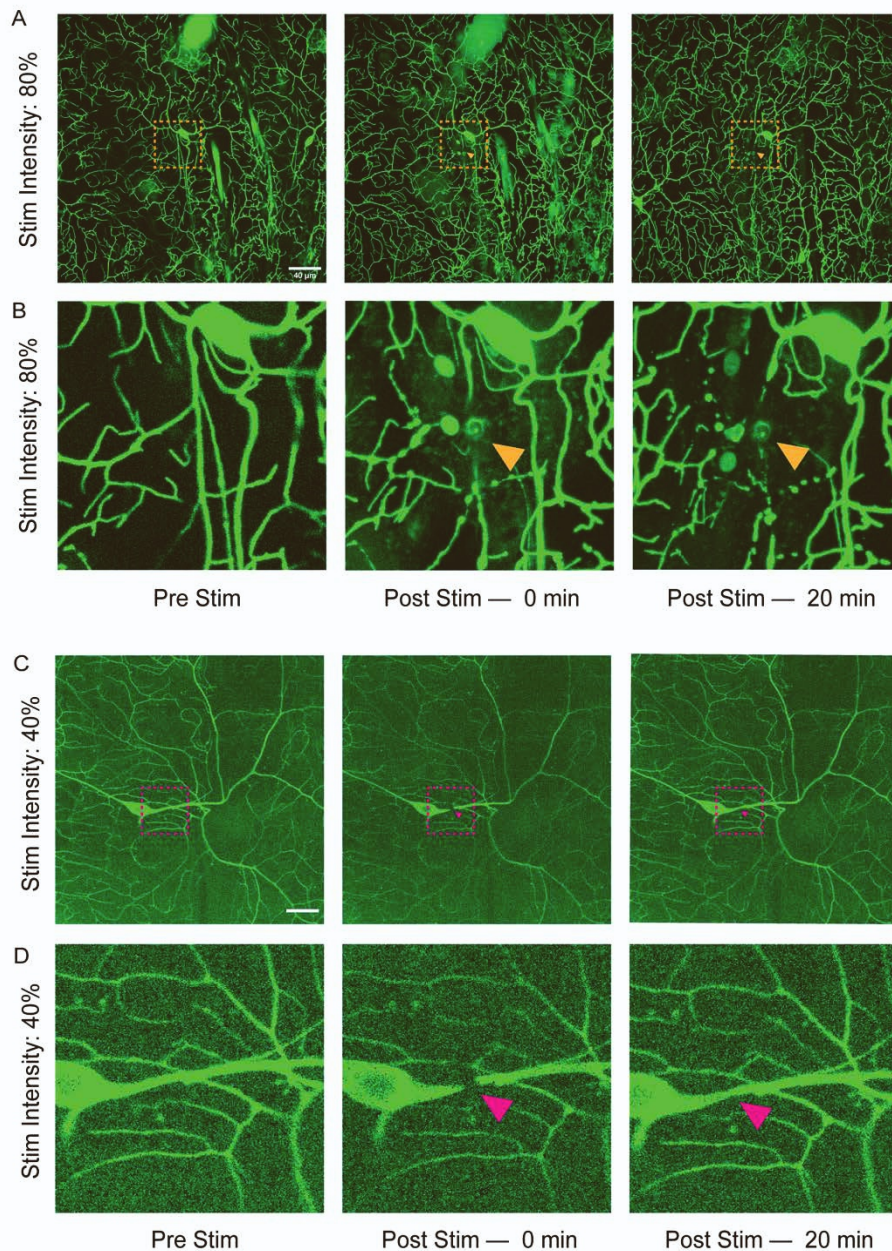

**Supplementary Figure 2:** 405-nm stimulation causes bleaching versus puncture of larval cuticle depending on the wattage delivered. Panels shown are pre-stim (left), frame immediately following stimulation (center), and 20 minutes post-stimulation (right). (A) Montage of Class IV da neurons expressing CD4-td-GFP stimulated with 405-nm laser at 80% power. (B) Zoom-in of region indicated by the dashed magenta box shown in panel (A). Orange arrow highlights region where laser was focused. Central and right panels show puncture wound that does not recover (not photobleaching) 20 minutes post stimulation. (C) Montage of Class IV da neurons expressing CD4-td-GFP stimulated with 40-nm laser at 40% power. (D) Zoom-in of region indicated by the dashed magenta box shown in (C). Magenta arrow indicates region where laser was focused. Central panel shows localized bleaching of dendritic process; right panel shows same region after recovery (20 minutes post stimulation) with no puncture wound.

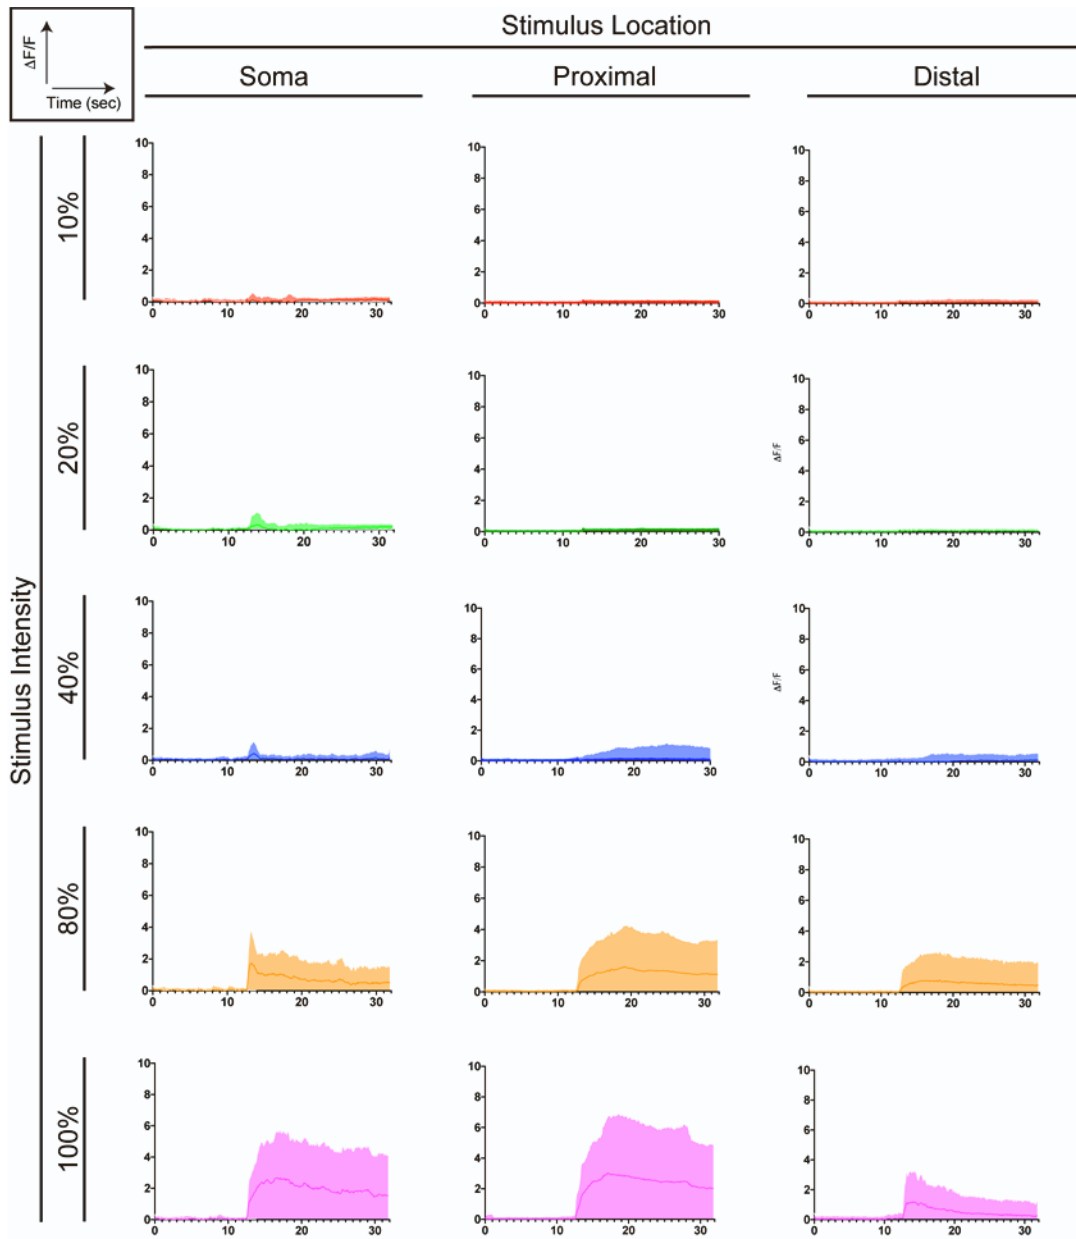

**Supplementary Figure 3:** Representative  $\Delta F/F$  traces of dendrite and soma ROIs for varying stimulation locations and wattages. Stimulus was activated at the 12.43 second mark (100th frame). Data across all experiments were combined. Mean and SD shown.

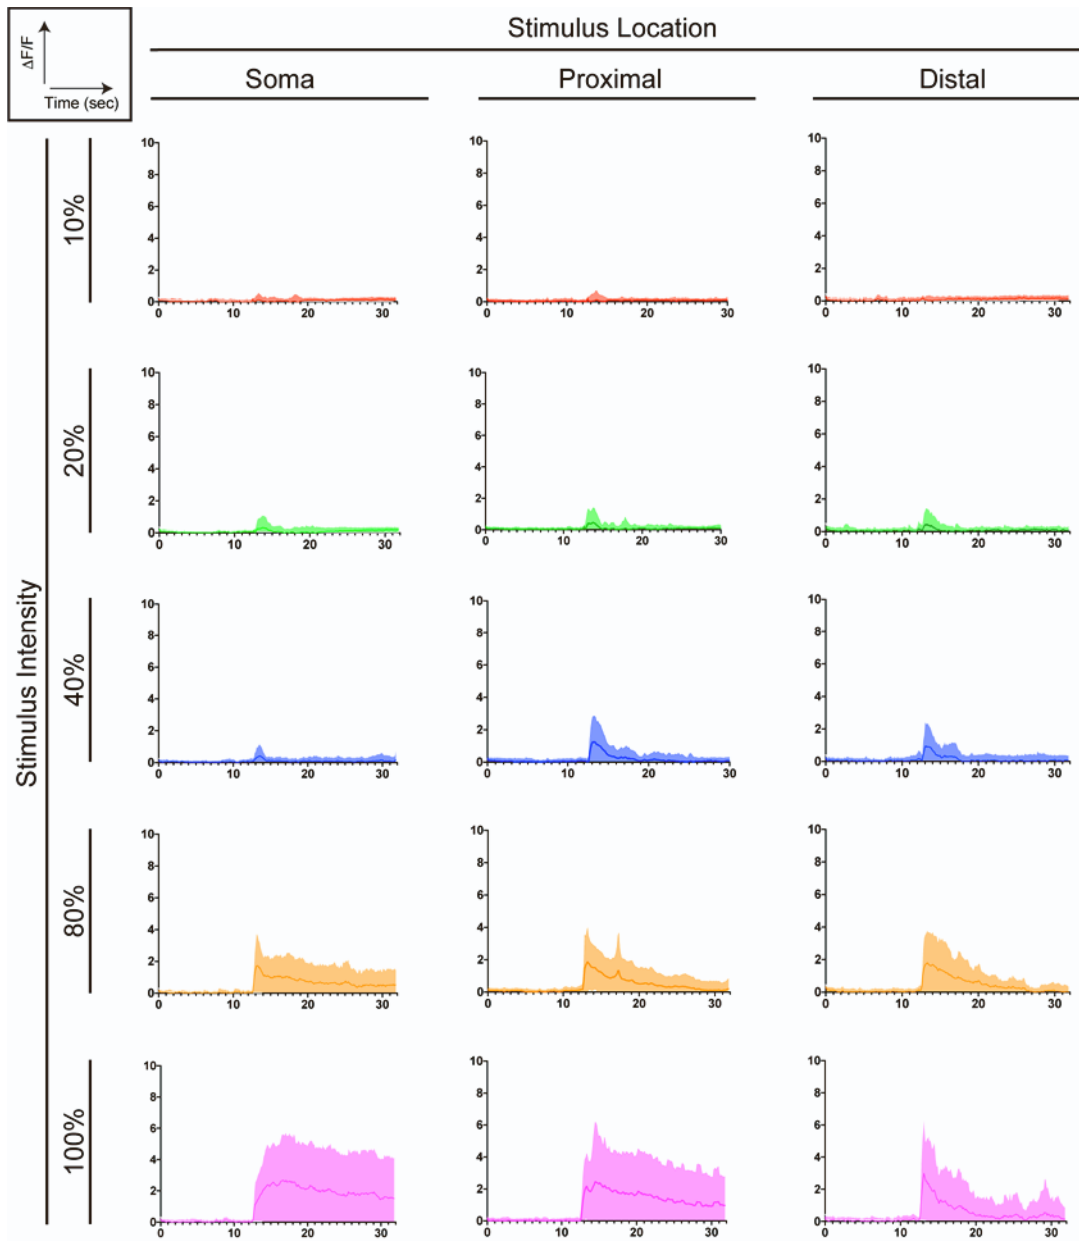

**Supplementary Figure 4:** Representative  $\Delta F/F$  traces of axon ROIs for varying stimulation locations and wattages. Stimulus was activated at the 12.43 second mark (100th frame). Data across all experiments were combined. Mean and SD shown

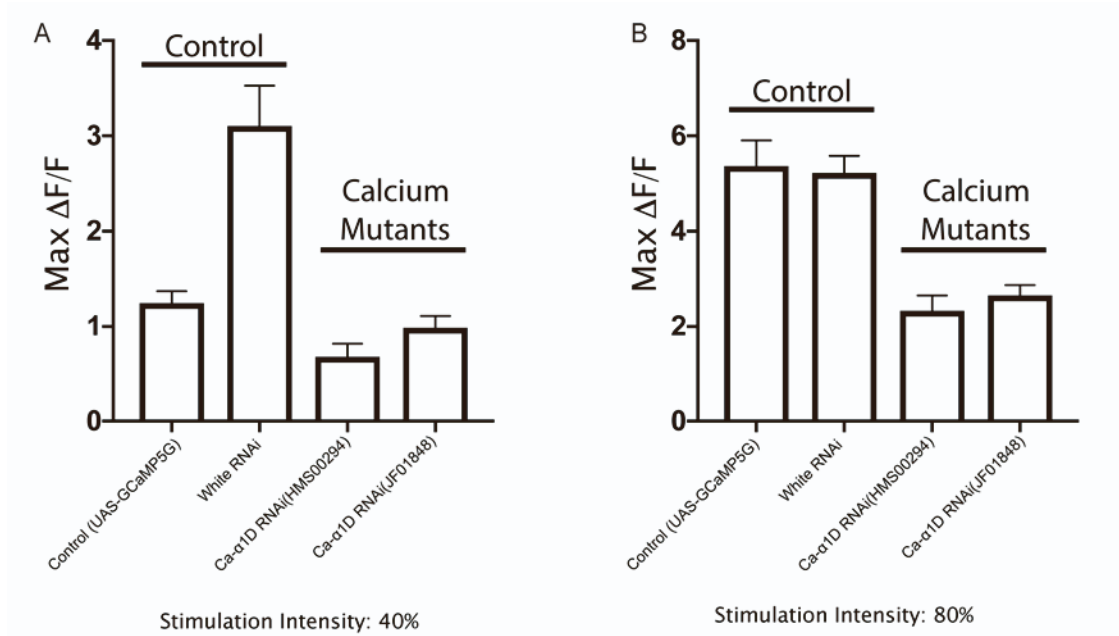

**Supplementary Figure 5:** Magnitudes of calcium transients from control (; UAS-GCaMP5G / ppk-GAL4; | N = 24, n = 72 and ; ppk-GAL4/+ ; white RNAi / UAS-GCaMP5G | N = 24, n = 72) and mutant cells (; ppk-GAL4/+ ; *Ca- $\alpha$ 1D RNAi*<sup>JF01848</sup> / UAS-GCaMP5G | N = 24, n = 72 and ; ppk-GAL4/+ ; *Ca- $\alpha$ 1D RNAi*<sup>HMS00294</sup> / UAS-GCaMP5G | N = 24, n = 72) irradiated at two different stimulation intensities, 40% (A) and 80% (B). Plots show mean and SEM.

|      | Fig 3C, 4D                                                                                                                     | Fig 3D, 4G                                                                                                                         |
|------|--------------------------------------------------------------------------------------------------------------------------------|------------------------------------------------------------------------------------------------------------------------------------|
|      | Axon (green) — “Non-contact”<br>(FWHM: 1 $\mu\text{m}$ )<br>vs.<br>Axon (green) — “Contact” (soma)<br>(FWHM: 1 $\mu\text{m}$ ) | Axon (green) — “Non-contact”<br>(FWHM: 0.5 $\mu\text{m}$ )<br>vs.<br>Axon (green) — “Contact” (soma)<br>(FWHM: 0.5 $\mu\text{m}$ ) |
| 10%  | $p > 0.9999$<br>(ns)                                                                                                           | $p > 0.9999$<br>(ns)                                                                                                               |
| 20%  | $p > 0.9999$<br>(ns)                                                                                                           | $p > 0.9999$<br>(ns)                                                                                                               |
| 40%  | $p = 0.9995$<br>(ns)                                                                                                           | $p > 0.9999$<br>(ns)                                                                                                               |
| 80%  | $p > 0.9999$<br>(ns)                                                                                                           | $p < 0.0001$<br>(****)<br>(Contact stimulation gives larger<br>response magnitude than non-contact)                                |
| 100% | $p = 0.0954$<br>(ns)                                                                                                           | $p < 0.0003$<br>(***)<br>(Contact stimulation gives larger<br>response magnitude than non-contact)                                 |

**Supplementary Table 1:** Comparison of magnitude of axon responses resulting from “non-contact” and “contact” stimulation (green ROIs and line) as shown in Fig 3C,D (non-contact stimulation) and Fig 4D,G (soma stimulation). Comparisons are shown for stimulation with FWHM: 1  $\mu\text{m}$  and FWHM: 0.5  $\mu\text{m}$ . Multiplicity adjusted p-values computed using Sidak’s multiple comparisons test shown (performed using Prism 8).



|      | Fig 3C, 4E                                                                                                       | Fig 3D, 4H                                                                                                           |
|------|------------------------------------------------------------------------------------------------------------------|----------------------------------------------------------------------------------------------------------------------|
|      | Axon (green) — “Non-contact”<br>(FWHM: 1 $\mu$ m)<br>vs.<br>Axon (green) — “Contact” (prox)<br>(FWHM: 1 $\mu$ m) | Axon (green) — “Non-contact”<br>(FWHM: 0.5 $\mu$ m)<br>vs.<br>Axon (green) — “Contact” (prox)<br>(FWHM: 0.5 $\mu$ m) |
| 10%  | p > 0.9999<br>(ns)                                                                                               | p > 0.9999<br>(ns)                                                                                                   |
| 20%  | p > 0.9999<br>(ns)                                                                                               | p > 0.9999<br>(ns)                                                                                                   |
| 40%  | p > 0.9999<br>(ns)                                                                                               | p > 0.9999<br>(ns)                                                                                                   |
| 80%  | p > 0.9999<br>(ns)                                                                                               | p < 0.1381<br>(ns)                                                                                                   |
| 100% | p = 0.8005<br>(ns)                                                                                               | p < 0.0001<br>(****)<br><br>(Contact stimulation gives larger<br>response magnitude than non-contact)                |

**Supplementary Table 2:** Comparison of magnitude of axon responses resulting from “non-contact” and “contact” stimulation (green ROIs and line) as shown in Fig 3C,D (non-contact stimulation) and Fig 4E,H (proximal stimulation). Comparisons are shown for stimulation with FWHM: 1  $\mu$ m and FWHM: 0.5  $\mu$ m. Multiplicity adjusted p-values computed using Sidak’s multiple comparisons test shown (performed using Prism 8).

|      | Fig 3C, 4F                                                                                                                       | Fig 3D, 4I                                                                                                                           |
|------|----------------------------------------------------------------------------------------------------------------------------------|--------------------------------------------------------------------------------------------------------------------------------------|
|      | Axon (green) — “Non-contact”<br>(FWHM: 1 $\mu\text{m}$ )<br>vs.<br>Axon (green) — “Contact” (distal)<br>(FWHM: 1 $\mu\text{m}$ ) | Axon (green) — “Non-contact”<br>(FWHM: 0.5 $\mu\text{m}$ )<br>vs.<br>Axon (green) — “Contact” (distal)<br>(FWHM: 0.5 $\mu\text{m}$ ) |
| 10%  | $p > 0.9999$<br>(ns)                                                                                                             | $p > 0.9999$<br>(ns)                                                                                                                 |
| 20%  | $p > 0.9999$<br>(ns)                                                                                                             | $p > 0.9999$<br>(ns)                                                                                                                 |
| 40%  | $p > 0.9999$<br>(ns)                                                                                                             | $p > 0.9999$<br>(ns)                                                                                                                 |
| 80%  | $p > 0.9999$<br>(ns)                                                                                                             | $p > 0.9999$<br>(ns)                                                                                                                 |
| 100% | $p = 0.9882$<br>(ns)                                                                                                             | $p > 0.9999$<br>(ns)                                                                                                                 |

**Supplementary Table 3:** Comparison of magnitude of axon responses resulting from “non-contact” and “contact” stimulation (green ROIs and line) as shown in Fig 3C,D (non-contact stimulation) and Fig 4F,I (distal stimulation). Comparisons are shown for stimulation with FWHM: 1  $\mu\text{m}$  and FWHM: 0.5  $\mu\text{m}$ . Multiplicity adjusted p-values computed using Sidak’s multiple comparisons test shown (performed using Prism 8).

|      | Figure 4D,G<br>Soma Stim                                                      | Figure 4D,G<br>Prox Stim                                                      | Figure 4E,H<br>Distal Stim                                                    | Figure 4E,H<br>Soma Stim                                                                            | Figure 4F,I<br>Prox Stim                                                                            | Figure 4F,I<br>Distal Stim                                                                          |
|------|-------------------------------------------------------------------------------|-------------------------------------------------------------------------------|-------------------------------------------------------------------------------|-----------------------------------------------------------------------------------------------------|-----------------------------------------------------------------------------------------------------|-----------------------------------------------------------------------------------------------------|
|      | Axon (green line) (FWHM: 1 $\mu$ m) vs. Axon (green line) (FWHM: 0.5 $\mu$ m) | Axon (green line) (FWHM: 1 $\mu$ m) vs. Axon (green line) (FWHM: 0.5 $\mu$ m) | Axon (green line) (FWHM: 1 $\mu$ m) vs. Axon (green line) (FWHM: 0.5 $\mu$ m) | Dendrite & Soma (black line) (FWHM: 1 $\mu$ m) vs. Dendrite & Soma (black line) (FWHM: 0.5 $\mu$ m) | Dendrite & Soma (black line) (FWHM: 1 $\mu$ m) vs. Dendrite & Soma (black line) (FWHM: 0.5 $\mu$ m) | Dendrite & Soma (black line) (FWHM: 1 $\mu$ m) vs. Dendrite & Soma (black line) (FWHM: 0.5 $\mu$ m) |
| 10%  | p = 0.9998<br>(ns)                                                            | p > 0.9999<br>(ns)                                                            | p > 0.9999<br>(ns)                                                            | p > 0.9999<br>(ns)                                                                                  | p = 0.9998<br>(ns)                                                                                  | p > 0.9999<br>(ns)                                                                                  |
| 20%  | p > 0.9999<br>(ns)                                                            | p = 0.9999<br>(ns)                                                            | p > 0.9999<br>(ns)                                                            | p = 0.8078<br>(ns)                                                                                  | p > 0.9999<br>(ns)                                                                                  | p = 0.0675<br>(ns)                                                                                  |
| 40%  | p = 0.2251<br>(ns)                                                            | p = 0.9626<br>(ns)                                                            | p = 0.9434<br>(ns)                                                            | p = 0.1265<br>(ns)                                                                                  | p = 0.0605<br>(ns)                                                                                  | p > 0.9999<br>(ns)                                                                                  |
| 80%  | p < 0.0001<br>(****)                                                          | p < 0.0563<br>(ns)                                                            | p > 0.9999<br>(ns)                                                            | p < 0.0001<br>(****)                                                                                | p = 0.0016<br>(**)                                                                                  | p < 0.0001<br>(****)                                                                                |
| 100% | p = 0.0746<br>(ns)                                                            | p = 0.0012<br>(**)                                                            | p = 0.9940<br>(ns)                                                            | p < 0.0001<br>(****)                                                                                | p = 0.9380<br>(ns)                                                                                  | p < 0.0001<br>(****)                                                                                |

**Supplementary Table 4:** Comparison of magnitude of calcium responses shown in Figure 4 D-I across two different stimulation irradiance settings. Axon ROI (FWHM: 1  $\mu$ m) were compared to axon ROI (FWHM: 0.5  $\mu$ m). Dendrite & soma ROI (FWHM: 1  $\mu$ m) were compared to dendrite & soma ROI (FWHM: 0.5  $\mu$ m). Multiplicity adjusted p-values computed using Sidak's multiple comparisons test shown (performed using Prism 8).

|                        | Surface Model (Equation 1) |          |       | Volume Model (Equation 2) |          |       |
|------------------------|----------------------------|----------|-------|---------------------------|----------|-------|
|                        | n                          | $\gamma$ | Error | n                         | $\gamma$ | Error |
| Dendrites and Soma ROI | 1.71                       | 8.125    | 56.99 | 1.87                      | 0.097    | 39.07 |
| Axon ROI               | 1.33                       | 0.346    | 24.29 | 1.66                      | 0.015    | 42.19 |

**Supplementary Table 5:** Summary of modeling fit parameters for dendrite and soma ROI and axon ROIs using the surface model (equation 1, See *Materials and Methods*) and volume model (equation 2, See *Materials and Methods*). Input parameters for the model are provided separately in Table 6 and Table 7. Visual plots of modeling results are shown in Figure 6 C-H.

|      | Figure 3C                                                                                                           | Figure 3C                                                                                                               | Figure 3C, D                                                                                            | Figure 3C, D                                                                                                                        |
|------|---------------------------------------------------------------------------------------------------------------------|-------------------------------------------------------------------------------------------------------------------------|---------------------------------------------------------------------------------------------------------|-------------------------------------------------------------------------------------------------------------------------------------|
|      | Axon (green line)<br>(FWHM: 1 $\mu\text{m}$ )<br>vs.<br>Dendrite & Soma<br>(black line)<br>(FWHM: 1 $\mu\text{m}$ ) | Axon (green line)<br>(FWHM: 0.5 $\mu\text{m}$ )<br>vs.<br>Dendrite & Soma<br>(black line)<br>(FWHM: 0.5 $\mu\text{m}$ ) | Axon (green line)<br>(FWHM: 1 $\mu\text{m}$ )<br>vs.<br>Axon (green line)<br>(FWHM: 0.5 $\mu\text{m}$ ) | Dendrite & Soma<br>(black line)<br>(FWHM: 1 $\mu\text{m}$ )<br>vs.<br>Dendrite & Soma<br>(black line)<br>(FWHM: 0.5 $\mu\text{m}$ ) |
| 10%  | p = 0.9317<br>(ns)                                                                                                  | p = 0.1117<br>(ns)                                                                                                      | p = 0.9751<br>(ns)                                                                                      | p = 0.8456<br>(ns)                                                                                                                  |
| 20%  | P = 0.7630<br>(ns)                                                                                                  | p = 0.0175<br>(*)                                                                                                       | p = 0.7790<br>(ns)                                                                                      | p = 0.9719<br>(ns)                                                                                                                  |
| 40%  | p < 0.0001<br>(****)                                                                                                | p < 0.0001<br>(****)                                                                                                    | p = 0.9896<br>(ns)                                                                                      | p = 0.1417<br>(ns)                                                                                                                  |
| 80%  | p < 0.0001<br>(****)                                                                                                | p < 0.0001<br>(****)                                                                                                    | p > 0.9999<br>(ns)                                                                                      | p = 0.0032<br>(**)                                                                                                                  |
| 100% | p < 0.0001<br>(****)                                                                                                | p < 0.0001<br>(****)                                                                                                    | p > 0.9999<br>(ns)                                                                                      | p = 0.0193<br>(**)                                                                                                                  |

**Supplementary Table 6:** Comparison of magnitude of calcium responses shown in Figure 3 C, D. Multiplicity adjusted p-values computed using Sidak's multiple comparisons test shown (performed using Prism 8).

|             | <b>Figure 3E</b>                                                                    |
|-------------|-------------------------------------------------------------------------------------|
|             | <b>Axonal Response latency</b><br><b>(FWHM: 1 μm)</b><br>vs.<br><b>(FWHM: 1 μm)</b> |
| <b>10%</b>  | p = 0.2011<br>(ns)                                                                  |
| <b>20%</b>  | p = 0.0004<br>(***)                                                                 |
| <b>40%</b>  | p = 0.4851<br>(ns)                                                                  |
| <b>80%</b>  | p = 0.9710<br>(ns)                                                                  |
| <b>100%</b> | p > 0.9999<br>(ns)                                                                  |

**Supplementary Table 7:** Comparison of latencies for axon ROIs stimulated under the “non-contact” condition as shown in Figure 3E. Multiplicity adjusted p-values computed using Sidak's multiple comparisons test shown (performed using Prism 8).

|      | Figure 4D<br>Soma Stim                                                                                            | Figure 4E<br>Prox Stim                                                                                            | Figure 4F<br>Distal Stim                                                                                          | Figure 4G<br>Soma Stim                                                                                                | Figure 4H<br>Prox Stim                                                                                                | Figure 4I<br>Distal Stim                                                                                              |
|------|-------------------------------------------------------------------------------------------------------------------|-------------------------------------------------------------------------------------------------------------------|-------------------------------------------------------------------------------------------------------------------|-----------------------------------------------------------------------------------------------------------------------|-----------------------------------------------------------------------------------------------------------------------|-----------------------------------------------------------------------------------------------------------------------|
|      | Axon<br>(green line)<br>(FWHM:<br>1 $\mu$ m)<br>vs.<br>Dendrite &<br>Soma<br>(black line)<br>(FWHM:<br>1 $\mu$ m) | Axon<br>(green line)<br>(FWHM:<br>1 $\mu$ m)<br>vs.<br>Dendrite &<br>Soma<br>(black line)<br>(FWHM:<br>1 $\mu$ m) | Axon<br>(green line)<br>(FWHM:<br>1 $\mu$ m)<br>vs.<br>Dendrite &<br>Soma<br>(black line)<br>(FWHM:<br>1 $\mu$ m) | Axon<br>(green line)<br>(FWHM:<br>0.5 $\mu$ m)<br>vs.<br>Dendrite &<br>Soma<br>(black line)<br>(FWHM:<br>0.5 $\mu$ m) | Axon<br>(green line)<br>(FWHM:<br>0.5 $\mu$ m)<br>vs.<br>Dendrite &<br>Soma<br>(black line)<br>(FWHM:<br>0.5 $\mu$ m) | Axon<br>(green line)<br>(FWHM:<br>0.5 $\mu$ m)<br>vs.<br>Dendrite &<br>Soma<br>(black line)<br>(FWHM:<br>0.5 $\mu$ m) |
| 10%  | p = 0.9975<br>(ns)                                                                                                | p = 0.9998<br>(ns)                                                                                                | p = 0.9998<br>(ns)                                                                                                | p > 0.9999<br>(ns)                                                                                                    | p > 0.9999<br>(ns)                                                                                                    | p > 0.9999<br>(ns)                                                                                                    |
| 20%  | p = 0.8916<br>(ns)                                                                                                | p = 0.9006<br>(ns)                                                                                                | p = 0.6027<br>(ns)                                                                                                | p = 0.9993<br>(ns)                                                                                                    | p = 0.9991<br>(ns)                                                                                                    | p = 0.9904<br>(ns)                                                                                                    |
| 40%  | p = 0.9993<br>(ns)                                                                                                | p = 0.2950<br>(ns)                                                                                                | p = 0.0041<br>(**)                                                                                                | p > 0.9999<br>(ns)                                                                                                    | p = 0.6824<br>(ns)                                                                                                    | p = 0.2377<br>(ns)                                                                                                    |
| 80%  | p = 0.9981<br>(ns)                                                                                                | p = 0.9921<br>(ns)                                                                                                | p = 0.0010<br>(***)                                                                                               | p = 0.9593<br>(ns)                                                                                                    | p = 0.7610<br>(ns)                                                                                                    | p = 0.9954<br>(ns)                                                                                                    |
| 100% | p = 0.4851<br>(ns)                                                                                                | p = 0.3031<br>(ns)                                                                                                | p = <0.0001<br>(****)                                                                                             | p = 0.5376<br>(ns)                                                                                                    | p = 0.8493<br>(ns)                                                                                                    | p > 0.9999<br>(ns)                                                                                                    |

**Supplementary Table 8:** Comparison of magnitude of calcium responses between axons and dendrite/soma ROIs for the “contact” dendritic response as shown in Figures 4 D-I. Multiplicity adjusted p-values computed using Sidak's multiple comparisons test shown (performed using Prism 8).

|             | Figure 5A, B                                                                                                                                                                | Figure 5A, B                                                                                                                                  |
|-------------|-----------------------------------------------------------------------------------------------------------------------------------------------------------------------------|-----------------------------------------------------------------------------------------------------------------------------------------------|
|             | <b>Dendrite &amp; Soma (black)</b><br><b>(FWHM: 1 <math>\mu\text{m}</math>)</b><br>vs.<br><b>Dendrite &amp; Soma (black)</b><br><b>(FWHM: 0.5 <math>\mu\text{m}</math>)</b> | <b>Axon (green)</b><br><b>(FWHM: 1 <math>\mu\text{m}</math>)</b><br>vs.<br><b>Axon (green)</b><br><b>(FWHM: 0.5 <math>\mu\text{m}</math>)</b> |
| <b>10%</b>  | $p = 0.0052$<br>(**)                                                                                                                                                        | $p = 0.9994$<br>(ns)                                                                                                                          |
| <b>20%</b>  | $p < 0.0001$<br>(****)                                                                                                                                                      | $p > 0.9999$<br>(ns)                                                                                                                          |
| <b>40%</b>  | $p < 0.0001$<br>(****)                                                                                                                                                      | $p > 0.9999$<br>(ns)                                                                                                                          |
| <b>80%</b>  | $p = 0.9046$<br>(ns)                                                                                                                                                        | $p > 0.9999$<br>(ns)                                                                                                                          |
| <b>100%</b> | $p = 0.9537$<br>(ns)                                                                                                                                                        | $p > 0.9999$<br>(ns)                                                                                                                          |

**Supplementary Table 9:** Comparison of latencies for ROIs stimulated with two different irradiance settings in Figure 5. Multiplicity adjusted p-values computed using Sidak's multiple comparisons test shown (performed using Prism 8).



| Power (P) (%) | Laser Width ( $\sigma$ ) (nm) | Dendrite Radius (r) (nm) | Experimental $\Delta F/F$ (F) | Modeled SEM (WLS weight) |
|---------------|-------------------------------|--------------------------|-------------------------------|--------------------------|
| 0             | 212.31                        | 500                      | 0                             | 0.1558                   |
| 10            | 212.31                        | 500                      | 0.182350664                   | 0.22717205               |
| 20            | 212.31                        | 500                      | 0.076460389                   | 0.185726596              |
| 40            | 212.31                        | 500                      | 2.050158743                   | 0.958232132              |
| 80            | 212.31                        | 500                      | 5.025163541                   | 2.12264901               |
| 100           | 212.31                        | 500                      | 5.074426106                   | 2.141930378              |
| 0             | 212.31                        | 200                      | 0                             | 0.1558                   |
| 10            | 212.31                        | 200                      | 0.005188064                   | 0.157830608              |
| 20            | 212.31                        | 200                      | 0.860460567                   | 0.492584266              |
| 40            | 212.31                        | 200                      | 0.164808405                   | 0.22030601               |
| 80            | 212.31                        | 200                      | 2.548603702                   | 1.153323489              |
| 100           | 212.31                        | 200                      | 2.948527166                   | 1.309853533              |
| 0             | 212.31                        | 1000                     | 0                             | 0.1558                   |
| 10            | 212.31                        | 1000                     | 0.03473628                    | 0.16939578               |
| 20            | 212.31                        | 1000                     | 0.763529255                   | 0.45464535               |
| 40            | 212.31                        | 1000                     | 1.779650087                   | 0.852355044              |
| 80            | 212.31                        | 1000                     | 4.722394194                   | 2.004145087              |
| 100           | 212.31                        | 1000                     | 7.703064753                   | 3.170779545              |
| 0             | 424.62                        | 500                      | 0                             | 0.1558                   |
| 10            | 424.62                        | 500                      | 0.008014336                   | 0.158936811              |
| 20            | 424.62                        | 500                      | 0                             | 0.1558                   |
| 40            | 424.62                        | 500                      | 0.182200981                   | 0.227113464              |
| 80            | 424.62                        | 500                      | 2.328810344                   | 1.067296369              |
| 100           | 424.62                        | 500                      | 4.482075196                   | 1.910084232              |
| 0             | 424.62                        | 200                      | 0                             | 0.1558                   |
| 10            | 424.62                        | 200                      | 0.022429348                   | 0.164578847              |
| 20            | 424.62                        | 200                      | 0.008520127                   | 0.159134778              |
| 40            | 424.62                        | 200                      | 0.163382325                   | 0.219747842              |
| 80            | 424.62                        | 200                      | 0.892799903                   | 0.505241882              |
| 100           | 424.62                        | 200                      | 1.369965549                   | 0.692004516              |
| 0             | 424.62                        | 1000                     | 0                             | 0.1558                   |
| 10            | 424.62                        | 1000                     | 0.003978684                   | 0.157357257              |
| 20            | 424.62                        | 1000                     | 0.076913166                   | 0.185903813              |
| 40            | 424.62                        | 1000                     | 0.366020076                   | 0.299060258              |
| 80            | 424.62                        | 1000                     | 1.869151273                   | 0.887385808              |
| 100           | 424.62                        | 1000                     | 4.580236882                   | 1.948504716              |

**Supplementary Table 10:** Modeling input parameter values for dendrite and soma ROI. 100% power corresponds to 43 mW for both laser profiles (see Supplementary Figure 1).

| Power (P) (%) | Laser Width ( $\sigma$ ) (nm) | Dendrite Radius (r) (nm) | Experimental $\Delta F/F$ (F) | Modeled SEM (WLS weight) |
|---------------|-------------------------------|--------------------------|-------------------------------|--------------------------|
| 0             | 212.31                        | 500                      | 0                             | 0.1445                   |
| 10            | 212.31                        | 500                      | 0.068684925                   | 0.168677094              |
| 20            | 212.31                        | 500                      | 0.392383484                   | 0.282618986              |
| 40            | 212.31                        | 500                      | 0.782529208                   | 0.419950281              |
| 80            | 212.31                        | 500                      | 3.872628207                   | 1.507665129              |
| 100           | 212.31                        | 500                      | 6.07809914                    | 2.283990897              |
| 0             | 212.31                        | 200                      | 0                             | 0.1445                   |
| 10            | 212.31                        | 200                      | 0.01168088                    | 0.14861167               |
| 20            | 212.31                        | 200                      | 0.43328868                    | 0.297017615              |
| 40            | 212.31                        | 200                      | 1.77380998                    | 0.768881113              |
| 80            | 212.31                        | 200                      | 2.18446697                    | 0.913432373              |
| 100           | 212.31                        | 200                      | 2.81976898                    | 1.137058681              |
| 0             | 212.31                        | 1000                     | 0                             | 0.1445                   |
| 10            | 212.31                        | 1000                     | 0                             | 0.1445                   |
| 20            | 212.31                        | 1000                     | 0.360228787                   | 0.271300533              |
| 40            | 212.31                        | 1000                     | 2.011095156                   | 0.852405495              |
| 80            | 212.31                        | 1000                     | 5.684920583                   | 2.145592045              |
| 100           | 212.31                        | 1000                     | 5.734179428                   | 2.162931159              |
| 0             | 424.62                        | 500                      | 0                             | 0.1445                   |
| 10            | 424.62                        | 500                      | 0.140546121                   | 0.193972235              |
| 20            | 424.62                        | 500                      | 0.54426786                    | 0.336082287              |
| 40            | 424.62                        | 500                      | 1.292631317                   | 0.599506224              |
| 80            | 424.62                        | 500                      | 2.027996352                   | 0.858354716              |
| 100           | 424.62                        | 500                      | 3.37835648                    | 1.333681481              |
| 0             | 424.62                        | 200                      | 0                             | 0.1445                   |
| 10            | 424.62                        | 200                      | 0.091146399                   | 0.176583532              |
| 20            | 424.62                        | 200                      | 0.429240122                   | 0.295592523              |
| 40            | 424.62                        | 200                      | 1.189055302                   | 0.563047466              |
| 80            | 424.62                        | 200                      | 2.035088751                   | 0.86085124               |
| 100           | 424.62                        | 200                      | 3.170241314                   | 1.260424942              |
| 0             | 424.62                        | 1000                     | 0                             | 0.1445                   |
| 10            | 424.62                        | 1000                     | 0.182453729                   | 0.208723713              |
| 20            | 424.62                        | 1000                     | 0.498731771                   | 0.320053583              |
| 40            | 424.62                        | 1000                     | 0.500696023                   | 0.320745                 |
| 80            | 424.62                        | 1000                     | 2.037007512                   | 0.861526644              |
| 100           | 424.62                        | 1000                     | 3.852882468                   | 1.500714629              |

**Supplementary Table 11:** Modeling input parameter values for axon ROIs. 100% power corresponds to 43 mW for both laser profiles (see Supplementary Figure 1).
